# Supplementary material for: Electrochemical probing of the solution pH-induced structural alterations around the heme group in myoglobin
Source: Royal Society of Chemistry journal article supplement (doi:10.1039/c3cp52352g), 2013-01-01
Supplement: c3cp52352g.pdf [file c3cp52352g.pdf]

## Electronic Supplementary Information:

# Electrochemical probing the solution pH-induced structural alterations around the heme group in myoglobin

Yingdan Qian, Xiaoqing Xu, Qian Wang, Ping Wu,\* Hui Zhang, and Chenxin Cai\*

Jiangsu Key Laboratory of New Power Batteries, College of Chemistry and Materials Science, Nanjing Normal University, Nanjing 210097, P.R. China.

\* Corresponding author, E-mail: [wuping@njnu.edu.cn](mailto:wuping@njnu.edu.cn) (P. Wu); [cxcai@njnu.edu.cn](mailto:cxcai@njnu.edu.cn) (C. Cai)

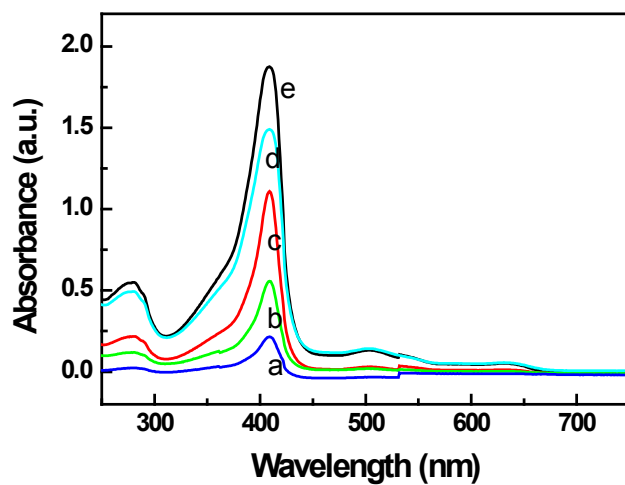

**Fig. S1** UV-vis absorption spectra of Mb in B-R buffer at pH 7. The concentration of Mb is (a) 2, (b) 5, (c) 10, (d) 20, and (e) 50  $\mu\text{M}$ . The spectra were recorded after the Mb was incubated in the buffer for 2 h. A protein-free buffer was used to record the baseline for correcting the spectrum.
